# Supplementary material
Source: Research Square preprint supplement (doi:10.21203/rs.3.rs-8776251/v1)
Supplement: Supplementary file 1 [file 2dcb27eb0caa99d677ba3375.docx]

**Highlights：**

1. AMR can effectively alleviate diarrhea and systemic inflammation induced by cold drinks and high-fat diet in mice.

2. Specifically manifested as repairing intestinal barrier function, improving microbial dysbiosis, and reducing intestinal permeability.

3. Its mechanism may involve inhibiting the entry of intestinal-derived LPS into the bloodstream, thereby blocking the excessive activation of downstream inflammatory pathways.
